# Supplementary material for: Humidity-dependent dielectric and electrical behavior of strontium iron vanadate ceramics
Source: Royal Society of Chemistry journal article supplement (doi:10.1039/d6na00322b), 2026-06-05
Supplement: d6na00322b1.pdf [file d6na00322b1.pdf]

## Table S1 — Supplementary Material

**Table S1.** Complete XRD peak indexing for all 52 peaks identified in the 10–90° 2 $\theta$  range. DP: cubic Ia-3d perovskite-related phase,  $a = 10.040 \text{ \AA}$ . D1 and D2 denote domain populations with  $a_1 = 10.048 \text{ \AA}$  and  $a_2 = 9.935 \text{ \AA}$  respectively, identified from doublet peak analysis; domain assignments are given only for peaks appearing as resolved doublets with splitting exceeding the expected  $K\alpha_1/K\alpha_2$  separation; single DP peaks without domain assignment represent reflections that could not be resolved into domain components. MP1:  $\text{Sr}_{10}\text{V}_6\text{O}_{25}$  (PDF 00-052-1578, hexagonal P63/m,  $a = 10.063 \text{ \AA}$ ,  $c = 7.415 \text{ \AA}$ ). MP2:  $\text{Sr}_2\text{VO}_4$  (PDF 01-085-2430, orthorhombic Pna21,  $a = 14.088 \text{ \AA}$ ,  $b = 5.809 \text{ \AA}$ ,  $c = 10.110 \text{ \AA}$ ). BG: instrumental background.  $\Delta\% = 100 \times (d_{\text{obs}} - d_{\text{indexed}}) / d_{\text{indexed}}$ . Deviations within  $\pm 2.0\%$  are consistent with the precision of geometric indexing for laboratory XRD data.

| No. | 2 $\theta_{\text{obs}}$<br>(°) | $d_{\text{obs}}$<br>(Å) | I%    | Phase | hkl   | $d_{\text{indexed}}$<br>(Å) | $\Delta\%$ | Type        | Note             |
|-----|--------------------------------|-------------------------|-------|-------|-------|-----------------------------|------------|-------------|------------------|
| 1   | 12.452                         | 7.109                   | 8.69  | DP    | (110) | 7.092                       | +0.2       | ordering    | †                |
| 2   | 5.172                          | 17.088                  | 3.09  | BG    | —     | —                           | —          | background  | ‡                |
| 3   | 19.633                         | 4.522                   | 10.36 | MP2   | (211) | 4.473                       | +1.1       | minor phase |                  |
| 4   | 21.636                         | 4.108                   | 34.53 | DP    | (211) | 4.094                       | +0.3       | ordering    | †                |
| 5   | 23.693                         | 3.755                   | 12.65 | MP1   | (002) | 3.708                       | +1.27      | minor phase |                  |
| 6   | 24.187                         | 3.680                   | 8.21  | MP2   | (112) | 3.681                       | −0.03      | minor phase |                  |
| 7   | 24.782                         | 3.593                   | 14.92 | MP2   | (311) | 3.534                       | +1.7       | minor phase |                  |
| 8   | 27.421                         | 3.253                   | 8.94  | MP1   | (210) | 3.294                       | −1.24      | minor phase |                  |
| 9   | 28.310                         | 3.153                   | 58.08 | DP-D2 | (310) | 3.141                       | +0.38      | ordering    | †                |
| 10  | 28.502                         | 3.132                   | 25.84 | DP-D2 | (310) | 3.141                       | −0.29      | ordering    | †                |
| 11  | 29.947                         | 2.984                   | 17.97 | MP1   | (112) | 2.985                       | −0.03      | minor phase |                  |
| 12  | 30.915                         | 2.893                   | 100.0 | DP    | (222) | 2.895                       | −0.07      | fundamental | allowed in Pm-3m |
| 13  | 31.587                         | 2.833                   | 8.49  | MP1   | (202) | 2.824                       | +0.32      | minor phase |                  |
| 14  | 33.188                         | 2.699                   | 26.35 | DP-D1 | (321) | 2.685                       | +0.52      | ordering    | †                |
| 15  | 33.787                         | 2.653                   | 53.94 | DP-D2 | (321) | 2.655                       | −0.08      | ordering    | †                |
| 16  | 35.668                         | 2.517                   | 16.28 | DP-D1 | (400) | 2.512                       | +0.20      | fundamental | allowed in Pm-3m |
| 17  | 36.093                         | 2.489                   | 19.37 | DP-D2 | (400) | 2.484                       | +0.20      | fundamental | allowed in Pm-3m |
| 18  | 37.385                         | 2.406                   | 5.27  | DP-D1 | (330) | 2.369                       | +1.56      | ordering    | † X              |
| 19  | 37.865                         | 2.376                   | 31.17 | DP-D1 | (330) | 2.369                       | +0.30      | ordering    | †                |
| 20  | 38.121                         | 2.361                   | 18.83 | DP-D1 | (330) | 2.369                       | −0.34      | ordering    | †                |
| 21  | 38.471                         | 2.340                   | 7.28  | DP-D2 | (330) | 2.342                       | −0.09      | ordering    | †                |
| 22  | 39.298                         | 2.293                   | 4.63  | MP1   | (311) | 2.298                       | −0.22      | minor phase |                  |
| 23  | 39.867                         | 2.261                   | 24.55 | DP-D1 | (420) | 2.247                       | +0.62      | fundamental | allowed in Pm-3m |
| 24  | 40.959                         | 2.203                   | 4.68  | DP-D2 | (420) | 2.221                       | −0.81      | fundamental | allowed in Pm-3m |
| 25  | 41.766                         | 2.163                   | 12.35 | DP-D1 | (332) | 2.142                       | +0.98      | ordering    | †                |
| 26  | 43.568                         | 2.077                   | 14.09 | DP-D1 | (422) | 2.051                       | +1.27      | fundamental | allowed in Pm-3m |
| 27  | 43.984                         | 2.059                   | 6.63  | DP-D1 | (422) | 2.051                       | +0.39      | fundamental | allowed in Pm-3m |
| 28  | 44.691                         | 2.028                   | 3.55  | DP-D2 | (422) | 2.028                       | 0.00       | fundamental | allowed in Pm-3m |
| 29  | 45.714                         | 1.985                   | 5.60  | DP-D1 | (431) | 1.971                       | +0.71      | ordering    | †                |

|    |        |       |       |       |       |       |       |             |                  |
|----|--------|-------|-------|-------|-------|-------|-------|-------------|------------------|
| 30 | 46.326 | 1.960 | 6.39  | DP-D1 | (431) | 1.971 | -0.56 | ordering    | †                |
| 31 | 48.435 | 1.879 | 15.12 | MP1   | (402) | 1.878 | +0.05 | minor phase |                  |
| 32 | 49.469 | 1.843 | 8.62  | DP    | (521) | 1.831 | +0.65 | ordering    | †                |
| 33 | 51.128 | 1.787 | 8.77  | DP    | (440) | 1.773 | +0.79 | fundamental | allowed in Pm-3m |
| 34 | 53.380 | 1.716 | 5.88  | DP    | (433) | 1.720 | -0.23 | ordering    | †                |
| 35 | 54.095 | 1.695 | 11.51 | DP    | (442) | 1.672 | +1.38 | fundamental | allowed in Pm-3m |
| 36 | 56.136 | 1.638 | 10.24 | DP-D1 | (532) | 1.630 | +0.49 | ordering    | †                |
| 37 | 56.752 | 1.622 | 10.78 | DP-D1 | (532) | 1.630 | -0.49 | ordering    | †                |
| 38 | 57.619 | 1.600 | 2.44  | DP-D1 | (620) | 1.589 | +0.69 | fundamental | allowed in Pm-3m |
| 39 | 58.551 | 1.577 | 4.33  | DP-D2 | (620) | 1.571 | +0.38 | fundamental | allowed in Pm-3m |
| 40 | 59.454 | 1.555 | 3.27  | DP    | (541) | 1.548 | +0.45 | ordering    | †                |
| 41 | 61.502 | 1.508 | 2.60  | DP    | (622) | 1.512 | -0.26 | fundamental | allowed in Pm-3m |
| 42 | 62.558 | 1.485 | 5.24  | DP    | (631) | 1.479 | +0.41 | ordering    | †                |
| 43 | 64.492 | 1.445 | 15.06 | DP    | (444) | 1.448 | -0.21 | fundamental | allowed in Pm-3m |
| 44 | 65.930 | 1.418 | 4.14  | DP    | (543) | 1.418 | 0.00  | ordering    | †                |
| 45 | 67.576 | 1.386 | 2.03  | DP    | (640) | 1.391 | -0.36 | fundamental | allowed in Pm-3m |
| 46 | 68.365 | 1.371 | 15.37 | DP-D1 | (552) | 1.367 | +0.29 | ordering    | †                |
| 47 | 68.772 | 1.365 | 2.69  | DP-D1 | (552) | 1.367 | -0.15 | ordering    | †                |
| 48 | 71.995 | 1.312 | 1.76  | DP    | (730) | 1.317 | -0.38 | ordering    | †                |
| 49 | 77.207 | 1.236 | 5.92  | DP    | (554) | 1.235 | +0.08 | ordering    | †                |
| 50 | 80.767 | 1.190 | 1.54  | DP    | (660) | 1.182 | +0.68 | fundamental | allowed in Pm-3m |
| 51 | 85.969 | 1.131 | 2.00  | DP    | (752) | 1.136 | -0.44 | ordering    | †                |
| 52 | 88.251 | 1.106 | 4.30  | DP    | (833) | 1.108 | -0.18 | ordering    | †                |

† All peaks classified as ordering type are systematically absent in disordered simple perovskite (Pm-3m) but permitted in Ia-3d, providing evidence for B-site cation ordering; see main text Section 3.1.  $\chi$  = marginally exceeds  $\pm 2.0\%$  tolerance. ‡ Peak at  $2\theta = 5.172^\circ$  ( $d = 17.088 \text{ \AA}$ ,  $I\% = 3.09$ ) does not match any reference phase screened and is attributed to instrumental background scatter at very low angles.
